# Supplementary material
Source: Elsevier journal article supplement (https://www.sciencedirect.com/science/article/pii/S0025775321004310)
Supplement: mmc1 [file S0025775321004310:mmc1.doc]

**Tabla suplementaria 1**. “Análisis uni y multivariable de la mortalidad por cualquier causa en los pacientes hospitalizados por COVID-19 con y sin tratamiento crónico previo con estatinas”.

|  | **Univariable** | | | **Multivariable** | | |
| --- | --- | --- | --- | --- | --- | --- |
| Variable | Haz. Ratio | Err. Std. | p | Haz. Ratio | Err. Std. | p |
| Uso crónico de estatinas | 1,68 (1,43-1,98) | 0,14 | < 0,001 | 0,95 (0,72-1,25) | 0,13 | 0,718 |
| Edad (por año) | 1,07 (1,06-1,08) | 0,00 | < 0,001 | 1,07 (1,06-1,08) | 0,00 | < 0,001 |
| Sexo masculino | 1,35 (1,14-1,60) | 0,12 | < 0,001 | 1,46 (1,21-1,76) | 0,14 | < 0,001 |
| Hipertensión | 2,42 (2,03-2,89) | 0,22 | < 0,001 | 1,08 (0,88-1,32) | 0,11 | 0,461 |
| Diabetes | 1,69 (1,42-2,01) | 0,15 | < 0,001 | 1,13 (0,93-1,38) | 0,12 | 0,223 |
| Dislipemia | 1,86 (1,57-2,19) | 0,16 | < 0,001 | 1,14 (0,86-1,52) | 0,17 | 0,354 |
| Insuficiencia cardiaca | 2,35 (1,82-3,03) | 0,31 | < 0,001 | 0,84 (0,62-1,14) | 0,13 | 0,257 |
| Cardiopatía isquémica | 1,86 (1,46-2,37) | 0,23 | < 0,001 | 0,75 (0,54-1,05) | 0,13 | 0,095 |
| Ictus/AIT | 2,56 (2,04-3,22) | 0,30 | < 0,001 | 1,24 (0,96-1,59) | 0,16 | 0,093 |
| Vasculopatía periférica | 2,47 (1,98-3,09) | 0,28 | < 0,001 | 1,44 (1,05-1,96) | 0,23 | 0,022 |
| FA/FTA | 2,79 (2,30-3,39) | 0,28 | < 0,001 | 1,20 (0,96-1,50) | 0,14 | 0,119 |
| Insuficiencia renal crónica | 2,66 (2,12-3,33) | 0,31 | < 0,001 | 1,29 (1,00-1,65) | 0,16 | 0,049 |
| EPOC | 1,82 (1,45-2,28) | 0,21 | < 0,001 | 1,13 (0,88-1,44) | 0,14 | 0,343 |
| Hepatopatía | 0,88 (0,49-1,61) | 0,27 | 0,687 | 0,88 (0,48-1,63) | 0,28 | 0,688 |
| PAS en urgencias (por mmHg) | 1,00 (0,99-1,00) | 0,00 | 0,201 | 0,99 (0,99-1,00) | 0,00 | < 0,001 |
| SatO2 en urgencias (por %) | 0,93 (0,93-0,94) | 0,00 | < 0,001 | 0,94 (0,94-0,95) | 0,00 | < 0,001 |
| Hidroxicloroquina | 0,64 (0,49-0,82) | 0,08 | < 0,001 | 0,60 (0,43-0,83) | 0,10 | 0,002 |
| Azitromicina | 0,65 (0,55-0,76) | 0,05 | < 0,001 | 0,81 (0,68-0,97) | 0,08 | 0,025 |
| Lopinavir/Ritonavir | 0,92 (0,73-1,16) | 0,11 | 0,465 | 0,78 (0,59-1,05) | 0,12 | 0,100 |
| Glucocorticoides | 2,26 (1,91-2,68) | 0,20 | < 0,001 | 1,74 (1,45-2,09) | 0,16 | < 0,001 |
