# Supplementary material
Source: Elsevier journal article supplement (https://www.sciencedirect.com/science/article/pii/S0025775321004310)
Supplement: mmc2 [file S0025775321004310:mmc2.doc]

**Tabla suplementaria 2**. “ Análisis uni y multivariable de la mortalidad por cualquier causa de los pacientes con y sin tratamiento hospitalario con estatinas ”.

|  | **Univariable** | | | **Multivariable** | | |
| --- | --- | --- | --- | --- | --- | --- |
| Variable | Haz. Ratio | Err. Std. | p | Haz. Ratio | Err. Std. | p |
| Uso hospitalario estatinas | 1,79 (1,52-2,10) | 0,15 | <0,001 | 1,03 (0,78-1,35) | 0,14 | 0,850 |
| Edad (por año) | 1,07 (1,06-1,08) | 0,00 | <0,001 | 1,07 (1,06-1,08) | 0,00 | <0,001 |
| Sexo masculino | 1,35 (1,14-1,60) | 0,12 | <0,001 | 1,46 (1,21-1,76) | 0,14 | <0,001 |
| Hipertensión | 2,42 (2,03-2,89) | 0,22 | <0,001 | 1,08 (0,88-1,32) | 0,11 | 0,456 |
| Diabetes | 1,69 (1,42-2,01) | 0,15 | <0,001 | 1,13 (0,93-1,38) | 0,12 | 0,226 |
| Dislipemia | 1,86 (1,57-2,19) | 0,16 | <0,001 | 1,08 (0,81-1,43) | 0,15 | 0,599 |
| Insuficiencia cardiaca | 2,35 (1,82-3,03) | 0,31 | <0,001 | 0,84 (0,62-1,14) | 0,13 | 0,274 |
| Cardiopatía isquémica | 1,86 (1,46-2,37) | 0,23 | <0,001 | 0,75 (0,53-1,04) | 0,13 | 0,088 |
| Ictus/AIT | 2,56 (2,04-3,22) | 0,30 | <0,001 | 1,24 (0,97-1,60) | 0,16 | 0,089 |
| Vasculopatía periférica | 2,47 (1,98-3,09) | 0,28 | <0,001 | 1,43 (1,05-1,95) | 0,23 | 0,024 |
| FA/FTA | 2,79 (2,30-3,39) | 0,28 | <0,001 | 1,20 (0,95-1,50) | 0,14 | 0,119 |
| Insuficiencia renal crónica | 2,66 (2,12-3,33) | 0,31 | <0,001 | 1,29 (1,00-1,65) | 0,16 | 0,048 |
| EPOC | 1,82 (1,45-2,28) | 0,21 | <0,001 | 1,13 (0,88-1,44) | 0,14 | 0,348 |
| Hepatopatía | 0,88 (0,49-1,61) | 0,27 | 0,687 | 0,88 (0,48-1,62) | 0,27 | 0,673 |
| PAS en urgencias (por mmHg) | 1,00 (0,99-1,00) | 0,00 | 0,201 | 0,99 (0,99-1,00) | 0,00 | <0,001 |
| SatO2 en urgencias (por %) | 0,93 (0,93-0,94) | 0,00 | <0,001 | 0,95 (0,94-0,95) | 0,00 | <0,001 |
| Hidroxicloroquina | 0,64 (0,49-0,82) | 0,08 | <0,001 | 0,60 (0,43-0,83) | 0,10 | 0,002 |
| Azitromicina | 0,65 (0,55-0,76) | 0,05 | <0,001 | 0,81 (0,67-0,97) | 0,08 | 0,024 |
| Lopinavir/Ritonavir | 0,92 (0,73-1,16) | 0,11 | 0,465 | 0,78 (0,58-1,04) | 0,12 | 0,095 |
| Glucocorticoides | 2,26 (1,91-2,68) | 0,20 | <0,001 | 1,74 (1,45-2,09) | 0,16 | <0,001 |
